1 Abbreviated Title: Machine learning based divergence detection

2 **Detection of adaptive divergence in populations of the stream mayfly *Ephemera strigata***  
3 **with machine learning**

4 Bin Li<sup>1,\*</sup>, Sakiko Yaegashi<sup>1,2</sup>, Thaddeus M Carvajal<sup>1,3</sup>, Maribet Gamboa<sup>1</sup> and Kozo Watanabe<sup>1,3</sup>

5 <sup>1</sup>Department of Civil and Environmental Engineering, Ehime University, Bunkyo-cho 3, Matsuyama, 790-  
6 8577, Japan

7 <sup>2</sup>Department of Civil and Environmental Engineering, University of Yamanashi, 4-3-11 Takeda, Kofu,  
8 Yamanashi 400-851, Japan

9 <sup>3</sup>Biological Control Research Unit, Center for Natural Science and Environmental Research, De La Salle  
10 University, Taft Ave Manila, Philippines

11 **Abstract**

12 Adaptive divergence is a key mechanism shaping the genetic variation of natural populations. A central  
13 question linking ecology with evolutionary biology concerns the role of environmental heterogeneity in  
14 determining adaptive divergence among local populations within a species. In this study, we examined  
15 adaptive the divergence among populations of the stream mayfly *Ephemera strigata* in the Natori River  
16 Basin in northeastern Japan. We used a genome scanning approach to detect candidate loci under  
17 selection and then applied a machine learning method (i.e. Random Forest) and traditional distance-  
18 based redundancy analysis (dbRDA) to examine relationships between environmental factors and  
19 adaptive divergence at non-neutral loci. We also assessed spatial autocorrelation at neutral loci to  
20 quantify the dispersal ability of *E. strigata*. Our main findings were as follows: 1) random forest shows a  
21 higher resolution than traditional statistical analysis for detecting adaptive divergence; 2) separating  
22 markers into neutral and non-neutral loci provides insights into genetic diversity, local adaptation and  
23 dispersal ability and 3) *E. strigata* shows altitudinal adaptive divergence among the populations in the  
24 Natori River Basin.

25 **Keywords:** local adaptation, adaptive divergence, altitude, aquatic insect, random forest, STRUCTURE

26 Email address: <sup>1</sup>binglee527@gmail.com; <sup>2</sup>sakikoy@yamanashi.ac.jp; <sup>3</sup>tads.carvajal@gmail.com;

27 <sup>4</sup>maribetg@gmail.com; <sup>5</sup>watanabe\_kozo@cee.ehime-u.ac.jp

28

29 A central question linking ecology with evolutionary biology concerns the role of environmental  
30 heterogeneity in determining adaptive divergence among local populations within a species. Adaptive  
31 divergence in aquatic insects is usually reported to be influenced by altitudinal gradients at the river-  
32 corridor scale (Hughes et al. 2009, Keller et al. 2013, Polato et al. 2017). Altitude is often strongly related  
33 with a number of environmental factors, such as temperature and oxygen, which greatly influenced the  
34 biology of organisms (Keller and Seehausen 2012, Halbritter et al. 2015). Thermal regimes directly  
35 regulate species' growth, development and mating behaviour, thereby setting limits on species  
36 distributions and abundances across landscapes (Li et al. 2013). Oxygen availability also restricts  
37 species' distributions by affecting the respiratory metabolism of aquatic organisms (Rostgaard and  
38 Jacobsen 2005). Multiple studies have focused on the genetic basis of adaptive divergence in aquatic  
39 insects because of their importance in freshwater ecosystem biomonitoring. Altitudinal genetic divergence  
40 has been reported in aquatic insects including caddisflies (*Plectrocnemia conspersa* and *Polycentropus*  
41 *flavomaculatus* (Wilcock et al. 2007), *Stenopsyche marmorata* (Yaegashi et al. 2014), stoneflies  
42 (*Dinocras cephalotes*) (Elbrecht et al. 2014) and mayflies (*Atalophlebia*) (Baggiano et al. 2011). However,  
43 most of these studies were based on a given gene or a limited number of candidate genes.  
44 The development of genome scanning approaches, such as Amplified Fragment Length Polymorphism  
45 (AFLP), allows the study of numerous anonymous markers (loci) rather than the study of a few candidate  
46 genes. Compared with neutral loci, loci influenced by directional selection (i.e. non-neutral loci) are  
47 expected to exhibit higher levels of genetic divergence (Kirk and Freeland 2011). Therefore, based on the  
48 screening of a large numbers of candidate loci ('outlier' loci, reviewed by Nosil et al. 2009) and the  
49 estimation of the levels of genetic divergence, statistical methods can identify loci that are under direct  
50 selection or linked to loci under selection. Selected non-neutral loci can be used to test hypotheses about  
51 the adaptive process. Neutral loci may be available for accurate tests of neutral processes, such as  
52 isolation by distance (IBD) (Oleksa et al. 2013) and gene flow patterns, thereby avoiding the confounding  
53 effects of natural selection (Kirk and Freeland 2011).

54 In the ordinal analysis of genome scanning, non-neutral loci are detected based on genetic variation  
55 among populations with different phenotypes or ecotypes (Bonin et al. 2006, Nosil et al. 2008, Egan et al.  
56 2008, Galindo et al. 2009) or allopatric populations among different geographic localities (Medugorac et

57 al. 2009, Gaggiotti et al. 2009, Renaut et al. 2011). Genome scanning can also be conducted using  
58 genetically defined populations with unknown phenotypes or ecotypes. For example, Bayesian clustering  
59 methods (Pritchard et al. 2000, Falush et al. 2003, 2007) can delineate genetic populations prior to any  
60 observable phenotypic divergence and, therefore, may provide insights into the early stages of adaptive  
61 divergence (Whiteley et al. 2011).

62 The determination of the link between non-neutral loci and environmental factors is one of the most  
63 difficult tasks in molecular ecology. Conventional statistical methods such as the partial Mantel test  
64 (Legendre and Fortin 2010, Watanabe et al. 2014), distance-based redundancy analysis (dbRDA)  
65 (Watanabe and Monaghan 2017) and multivariate analysis of variance (MANOVA (Mccairns and  
66 Bernatchez 2008) have been widely applied, but these methods suffer from a number of limitations. First,  
67 associating genetic variance and environmental distances can result in bias and high error rates  
68 (Legendre and Fortin 2010, Guillot and Rousset 2013, Legendre et al. 2015). In addition, the Mantel test  
69 and dbRDA are limited to testing the linear independence between genetic and environmental distances  
70 among local populations. Fulfilling the underlying assumptions of conventional statistical methods (e.g.  
71 normal distribution and homogeneity of variance) can also be very difficult (Vittinghoff et al. 2012). On  
72 account of these concerns, modern statistical techniques, such as machine learning methods, are now  
73 being developed as promising alternatives. Machine learning methods are particularly effective in finding  
74 and describing structural patterns in data and providing the values of relative importance among variables  
75 (Prasad et al. 2006, Biau and Scornet 2016).

76 Among the variety of machine learning methods available, Random Forest (RF) (Breiman 2001) is one of  
77 the most widely used modelling techniques to generate high-prediction accuracy and evaluate the relative  
78 importance of explanatory variables in the model (Biau and Scornet 2016). RF is an ensemble tree-based  
79 method that constructs multiple decision trees from a dataset and combines results from all the trees to  
80 create a final predictive model. In ecological studies, RF has been applied to community-level studies to  
81 predict species' distributions and identify constrained environmental factors (Cutler 2007, Marmion et al.  
82 2009, Evans et al. 2011). In most studies, environmental data have been used as independent variables  
83 to predict the presence or absence of species' (dependent variables). The relative contributions of

84 environmental variables to species distributions are quantified by their relative importance obtained from  
85 the RF model. It may therefore be possible to extend the use of RF to population genetic studies where  
86 environmental variables are used to predict the presence or absence of a haplotype or allele at outlier  
87 loci. The relative importance of each environmental variable could be considered as its influence to outlier  
88 loci, which may strongly drive adaptive divergence.

89 In this study, we examined adaptive divergence using AFLP markers in populations of the stream mayfly  
90 *E. strigata* from the Natori River Basin in northeastern Honshu Island, Japan (Fig.1). The primary aims of  
91 the study were to determine the extent of local adaptation at the genome level in natural populations and  
92 to quantify associations between environmental gradients and adaptive divergence. We first detected loci  
93 under selection (non-neutral loci) based on locus-specific genetic differentiation among populations.  
94 Rather than defining populations a priori using geographic or phenotypic information, we delineated  
95 populations based on the discontinuities in the AFLP variation among individuals using a hierarchical  
96 analysis of STRUCTURE (Pritchard et al. 2000, Falush et al. 2003, 2007, Vähä et al. 2007). Focusing on  
97 non-neutral loci, we then applied RF to identify environmental variables most likely to contribute to  
98 adaptive divergence and compared our results with a traditional dbRDA to examine the feasibility of the  
99 method. Finally, we examined the dispersal patterns and dispersal distance in *E. strigata* using neutral  
100 loci.

## 101 **Methods**

### 102 **Study site and sampling**

103 *E. strigata* is a burrowing mayfly well studied in Japan and Korea (Ban and Kawai, 1986; Lee et al.,  
104 2008). In this study, sampling was carried out in the Natori River catchment in the Miyagi Prefecture in  
105 northeastern Japan (Fig. 1). Larval samples were collected at 11 sites from October 26 to November 12,  
106 2010. At each site, we collected *E. strigata* individuals using a Surber net (30 × 30 cm quadrat with mesh  
107 size 250 µm) along 200–900 m stream reaches. All specimens were preserved in the field in 99.5%  
108 ethanol, transported to the laboratory and identified to species level under a stereomicroscope (120×)  
109 using taxonomic keys (Kawai and Tanida 2005).

110 We measured six geographical parameters at each site using standard ecological methods in stream  
111 surveys (Hauer and Lamberti 2007, Watanabe et al. 2008). Stream order was determined using a  
112 1:25000 map. The width of the stream channel was measured at 10 randomly selected cross-sections  
113 using a tape measure. Longitude and latitude coordinates and altitude were recorded using a global  
114 positioning system on the river side. The riverine distance between two sites was measured on Google  
115 Maps using the ruler function.

#### 116 **DNA extraction and AFLP fingerprinting**

117 DNA from each individual was isolated from abdominal tissue by removing the digestive tract using the  
118 DNeasy 96 Blood & Tissue Kits (Qiagen). The concentration of extracted DNA was measured by Nano  
119 Drop ND-1000 spectrometer (Thermo Fisher Scientific) and diluted to 50 ng/ $\mu$ L. We genotyped 216  
120 individuals from 11 sites with the AFLP method (Vos et al. 1995). The restriction step followed the  
121 protocol by Watanabe et al. (2014). The ligation step was performed by adding 1 U T4 DNA ligase (New  
122 England), 0.2  $\mu$ L of 100 $\mu$ M MseI adapter, 0.2 $\mu$ M of EcoRI adapter, 2  $\mu$ L T4 DNA ligase buffer (10 $\times$ ) (New  
123 England) and up to 20  $\mu$ L dH<sub>2</sub>O and incubating the solution at 16°C for 12 h. The sequences of the MseI  
124 adapter and EcoRI adapters followed Reisch (2007). The adapters were manually prepared as follows: 1)  
125 mixing equal molar amounts of adapter oligomer, 2) denaturing at 95°C for 5 min and 3) incubating for 10  
126 min at room temperature. Restricted or ligated products were then diluted at a 1:19 ratio with 0.1 $\times$  TE  
127 buffer. Pre-selective amplification was performed in a mixture of 0.06  $\mu$ L of 100 $\mu$ M MseI and EcoRI  
128 primers (Reish 2007). 15  $\mu$ L of AFLP Amplification Core Mix (Applied Biosystems), 4  $\mu$ L of each  
129 restricted/ligated product and up to 29  $\mu$ L dH<sub>2</sub>O. Pre-selective polymerase chain reaction (PCR)  
130 parameters followed Reish (2007). PCR products were diluted 20 times by 0.1 $\times$  TE buffer.

131 For selective amplifications, we employed three types of primer pairs (EcoRI-AGG & MseI-CAT, EcoRI-  
132 ACC & MseI-CAC and EcoRI-AGG & MseI-CAC) that generate the most variable patterns in 64 types of  
133 selective primer pairs using three individuals. Each EcoRI primer was modified with Beckman Dye2, 3  
134 and 4 in 5'-end. The mixture of selective PCR was 0.1  $\mu$ L of 100 $\mu$ M MseI and EcoRI primers, 15 $\mu$ L of  
135 AFLP Amplification Core Mix (Applied Biosystems) and up to 20  $\mu$ L dH<sub>2</sub>O. We followed Reich (2007) to  
136 set PCR reaction parameters.

137 The selective PCR products were separated by capillary gel electrophoresis using CEQ8000 (Beckman  
138 Coulter). To adjust fluorescent intensity, each fluorescent PCR product was mixed with the following  
139 proportion EcoRI-AGG & MseI-CAT 4  $\mu$ L, EcoRI-ACC & MseI-CAC 2 $\mu$ L and EcoRI-AGG & MseI-CAC  
140 1 $\mu$ L. Peak sizes of PCR products were calculated with DNA Size Standard 600 (Beckman Coulter) using  
141 the CEQ8000 software (Beckman Coulter) with default settings.

## 142 **Hierarchical STRUCTURE analysis**

143 We defined populations based on discontinuities in AFLP variation using the individual-based Bayesian  
144 clustering method implemented in STRUCTURE v. 2.3 (Pritchard et al. 2000, Falush et al. 2003, 2007).  
145 We performed 20 runs of 50,000 iterations with a burn-in of 10,000 for each number of assumed  
146 populations (K) ranging from 1 to 15 using the admixture model and assuming correlated allele  
147 frequencies. We used a uniform prior for alpha (the parameter representing the degree of admixture) with  
148 a maximum of 10 and set  $\text{AlphaPrpsd}$  to 0.05. Lambda, the parameter representing the correlation in the  
149 parental allele frequencies, was estimated in a preliminary run using K = 1. The prior  $F_{ST}$  was set to the  
150 default value (mean = 0.01; standard deviation (SD) = 0.05).

151 To determine the optimal K, we computed the log-likelihood ( $\ln P(K)$ ) for each K and selected K with the  
152 highest standardized second order rate of change ( $\Delta K$ ) of  $\ln P(K)$  (Evanno et al. 2005). Although this  
153 method helps to correctly identify K in most situations, it is known to have two limitations. First, it is useful  
154 only for the uppermost level of a hierarchical genetic structure. Second, it is unable to find the best K if K  
155 = 1 (i.e. if there is no population substructure) (Evanno et al. 2005). To address these limitations, we used  
156 a hierarchical approach for STRUCTURE analysis modified from Vähä et al. (2007), which repeats the  
157 analysis at lower hierarchical levels until no substructure can be uncovered. The advantage of our  
158 method was that we used the Wilcoxon two-sample test to control the round of repeated analysis instead  
159 of checking the pattern of individual membership. Specifically, we compared the mean value of  $\ln P(K)$   
160 from 20 runs with optimal K (as determined using  $\Delta K$ ) with mean  $\ln P(K = 1)$  using the Wilcoxon two-  
161 sample test (Rosenberg et al. 2001). If  $\ln P(K = 1)$  was found to be significantly lower than  $\ln P(K)$  at  
162 the optimal K, we repeated the analysis within each of the K populations. At each hierarchical level,

163 individuals were assigned to subpopulations based on the individual membership coefficient (Pritchard et  
164 al. 2000).

### 165 **Outlier loci detection**

166 We used two different statistical methods to identify outlier loci. Dfdist (adapted from Fdist (Beaumont and  
167 Nichols 1996)) uses coalescent simulations to generate thousands of loci evolving under a neutral model  
168 of symmetrical islands with a mean global  $F_{ST}$  close to the observed global  $F_{ST}$ . Mean  $F_{ST}$  was calculated  
169 using the default method by first excluding 30% of the highest and lowest observed values. Empirical loci  
170 with  $F_{ST}$  values significantly greater ( $p < 0.05$ ) than the simulated distribution (generated with 50,000 loci)  
171 were considered to be outliers. Dfdist can detect both divergent selection and balancing selection, but we  
172 focused only on divergent selection in this study.

173 BayeScan is a hierarchical Bayesian model-based method first described in Beaumont and Balding  
174 (2004) and modified by Foll and Gaggiotti (2008) for dominant markers (available at  
175 <http://cmpg.unibe.ch/software/bayescan/>). The Bayesian method is based on the concept that  $F_{ST}$  values  
176 reflect contributions from locus-specific effects, such as selection, and population-specific effects, such as  
177 local effective size and immigration rates. The main advantage of this approach is that it allows for  
178 different demographic scenarios and different amounts of genetic drift in each population (Foll and  
179 Gaggiotti 2006, 2008). Using a reversible jump Markov Chain Monte Carlo approach, the posterior  
180 probability of each locus being subjected to selection is estimated. A locus is deemed to be influenced by  
181 selection if its  $F_{ST}$  is significantly higher or lower than the expectation provided by the coalescent  
182 simulations.

183 For all subsequent analyses, non-neutral loci were defined as outlier loci detected by the Dfdist and  
184 BayeScan methods at the 95% confidence level. Neutral loci were defined as loci detected by neither  
185 Dfdist nor BayeScan at the 95% thresholds. Loci detected as outliers by only one of the two methods  
186 were not considered in the further analyses.

### 187 **Analysis of genetic diversity**

188  $F_{ST}$  was calculated with ARLEQUIN v. 3.1 (Excoffier et al. 2009) using: 1) all loci, 2) only neutral loci and  
189 3) only non-neutral loci. Global heterozygosity among all populations ( $H_t$ ) and mean heterozygosity within  
190 populations ( $H_w$ ) were estimated separately for neutral and non-neutral loci with AFLP-SURV v. 1.0  
191 (Vekemans 2002) using the Bayesian method with a uniform prior distribution of allele frequencies  
192 (Zhivotovsky 1999). Molecular variance analysis (AMOVA) was also conducted using ARLEQUIN to  
193 provide the estimates of genetic variations among and within sampling sites. For the test of IBD, we  
194 examined the correlations of pairwise  $F_{ST}$  with geographical distance and riverine distance (i.e. distance  
195 along the watercourse) between sites using GeneAEx v. 6.5 (Peakall and Smouse 2012). The genetic  
196 distance between each pair of sites was quantified using mean pairwise  $F_{ST}$  for neutral and non-neutral  
197 loci using the Bayesian-estimated allele frequencies generated by AFLP-SURV.

198 We conducted genetic spatial autocorrelation analysis using neutral loci for geographic distance. Eight  
199 geographic distance classes defined every 4 km (from 0–4 km to 28–32 km) were used in the analysis.  
200 Individuals within the same site were considered to be separated by a distance of 0 km. We calculated  
201 Moran's I for each distance class using GeneAEx, where I ranges from –1 to 1, and the positive values  
202 indicate that sites within a given distance class have similar genetic structure. We used jackknifing to  
203 estimate the 95% confidence intervals.

#### 204 **Adaptive divergence modelling**

205 We determined the environmental variables that drive adaptive divergence at non-neutral loci using the  
206 RF model (Chawla et al. 2002, Maciejewski and Stefanowski 2011, Blagus and Lusa 2013). All the six  
207 environmental variables were used to predict the band presence/absence patterns at non-neutral loci. We  
208 assigned individuals from the same site to the same environmental conditions. The dataset was  
209 imbalanced because the number of individuals with band presence was not equal to that with band  
210 absence. The individuals were thus classified in two classes (i.e. presence and absence). We solved the  
211 data imbalance problem by oversampling for the minority class using the Synthetic Minority Oversampling  
212 Technique (SMOTE) (Chawla et al. 2002). SMOTE creates synthetic minority class sample units by taking  
213 the difference between the feature vector (sample) under consideration and its nearest neighbour. It then  
214 multiplies this difference by a random number between 0 and 1 and adds it to the feature vector under



215 consideration (Chawla et al. 2002). The process was conducted using the DMwR (Torgo 2013) and  
216 randomForest packages (Liaw and Wiener 2002) in the R programme (R Core Development Team 2015).  
217 Model performance was evaluated using the area under the receiver operating characteristic curve (AUC)  
218 (Janitza et al. 2013). The AUC value typically ranged from 0.5 (random prediction) to a maximum value of  
219 1, which represents the perfect model theoretically. As rules of thumb, an AUC value > 0.9 indicates very  
220 good model quality, a value < 0.7 indicates poor model quality, and a value ranging from 0.7 to 0.9  
221 indicates good model quality (Baldwin 2009).

222 We also conducted dbRDA as a comparative ordinal method. DbRDA was performed on the ordination  
223 solutions, rather than on the distance matrices (Legendre and Fortin 2010). In this study, pairwise genetic  
224 distances at non-neutral locus among sites were used to screen environmental factors that most closely  
225 relate to genetic divergence (Watanabe et al. 2017). The best model, comprising significant predictors,  
226 was selected using forward selection with permutation tests and an inclusion threshold of  $\alpha = 0.05$  using  
227 the ordistep function of the vegan package (Oksanen et al. 2015) in the R programme (R Core  
228 Development Team 2015). Significant differences were tested with the anova.cca function in the vegan  
229 package.

## 230 **Results**

### 231 **Hierarchical STRUCTURE analysis**

232 Hierarchical iterations by STRUCTURE detected significant substructure until the 4<sup>th</sup> iteration beyond the  
233 initial analysis (Fig. 2). In total, 14 groups were defined for the 216 *E. strigata* individuals collected in 11  
234 sites. Most groups were widespread over the sampling sites, whereas some groups were restricted to  
235 specific sites. For example, the members of groups 2, 3 and 8 occurred only in up- and middle-stream  
236 sites (Fig. 1: upstream sites, S1 and S6-8; middle-stream sites, S2-5).

### 237 **Outlier detection and genetic diversity**

238 Using our criterion of 95% significance with both Dfdist and BayeScan, 10 non-neutral loci and 346  
239 neutral loci were detected from the 372 polymorphic AFLP loci. Dfdist alone detected 10 outlier loci under

240 divergent selection and 11 outlier loci under balancing selection, respectively. Outlier loci under balancing  
241 selection were not involved in this study. All the 10 outlier loci under divergent selection were consistently  
242 identified by BayeScan, which alone identified 26 outliers (Table 1). Total genetic variation ( $H_t$ ) was lower  
243 at neutral loci than at non-neutral loci and the same trend occurred in mean genetic variation within sites  
244 ( $H_w$ ; Table 2). Mean global  $F_{ST}$  among all sites for all AFLP loci was 0.029 ( $p < 0.01$ ; AMOVA). When  
245 measured using neutral or non-neutral loci, we found global  $F_{ST}$  values of 0.021 ( $p < 0.01$ ) and 0.039 ( $p <$   
246 0.01), respectively (Table 2).

### 247 **Detection of adaptive divergence**

248 We separately built RF models for each of the 10 non-neutral loci. Of the 10 non-neutral loci, loci 56, 89  
249 and 254 were well predicted (i.e. AUC > 0.7) with altitude being the most important environmental  
250 variable (Fig. 3), With dbRDA, only genetic divergence at locus 254 was significantly predicted ( $p < 0.05$ )  
251 (Fig. 4) with altitude explaining 54% of the genetic divergence at this locus. For the other non-neutral loci,  
252 no significant relationship with environmental factors was found with dbRDA ( $p > 0.05$ ). IBD was not  
253 significant for both geographic ( $r = 0.11$ ,  $p = 0.33$ ) and riverine distance ( $r = 0.06$ ,  $p = 0.49$ )  
254 (Supplementary Fig. S1). The results of the spatial autocorrelation analysis based on neutral loci showed  
255 significant positive autocorrelation coefficients at the shortest range (0–4 km; Fig. 5).

### 256 **Discussion**

257 In this study, we used an RF model to examine the relationship between environmental factors and  
258 adaptive divergence at non-neutral loci in the stream mayfly *E. strigata*. Ordinal statistical tests of multiple  
259 linear regression method need assumptions that data are normally distributed with homogeneity of  
260 variance and are independent from one another (Vittinghoff et al. 2012), and this is often difficult to fulfil.  
261 The environmental factors investigated in this study did not show strong independency among variables.  
262 However, RF can overcome the limitations of regression models and accommodate pronounced  
263 nonlinearities in the exploration of gene-environment relationships in large genomic data sets (Breiman  
264 2001, Fitzpatrick and Keller 2015, Biau and Scornet 2016). We developed RF models for each of the 10  
265 non-neutral loci detected by both BayeScan and Dfdist. Three out of the 10 non-neutral loci (56, 89 and

254) showed good model prediction performance ( $AUC > 0.7$ ), whereas the other seven could not be modelled well. This may be explained by natural selection at these seven loci being driven by environmental factors not included in our analysis (e.g. velocity and chlorophyll a) (Watanabe et al. 2014, Li et al. 2016, Brouwer et al. 2017). RF is recommended for future studies including huge numbers of environmental variables to assess their effects on adaptive divergence because RF can perform well with large numbers of variables (Genuer et al. 2010).

To compare the performance of RF with ordinal statistical analysis, we also conducted dbRDA analysis for all the 10 non-neutral loci. Only one locus (254) was well-modelled by dbRDA. This locus was one of the three loci accurately modelled by RF and the selected environmental factor (i.e. altitude) was consistent with results from RF. The low number of loci modelled in dbRDA may be because of its ability to only test linear independence<sup>29</sup>. The ranking of variable importance in RF relies on the principle that rearranging the values of unimportant variables should not degrade the predictive accuracy of the model (Breiman 2001). As a result, RF could reduce the influence of variable dependency on model results compared with dbRDA (Archer and Kimes 2008, Genuer et al. 2010).

To identify non-neutral loci, we used populations delineated by a hierarchical STRUCTURE analysis as an alternative to the geographic or phenotypic populations that are typically used in ordinal analysis of genome scanning. The STRUCTURE analysis successfully delineated populations with significant genetic differences, something that is difficult to achieve using visible characters such as phenotypes, ecotypes or geographic localities (Pritchard et al. 2000). The STRUCTURE analysis can delineate genetic populations among individuals prior to the occurrence of observable phenotypic divergence and may provide a means to investigate the early stages of adaptive divergence prior to phenotypic divergence in population delineation and detection of non-neutral loci (Whiteley et al. 2011).

We introduced a hierarchical approach to the STRUCTURE analysis that enabled us to look at the finer population structure (i.e. higher K) than the ordinal STRUCTURE analysis, which stops once the uppermost hierarchical level is found. The number of populations (K) is an important determinant in outlier detection (Foll and Gaggiotti 2008). We conducted outlier loci detection based on the geographical populations and uppermost hierarchical level of the STRUCTURE analysis that delineated two

293 populations, but we could not detect any outlier loci. This clearly shows the advantages of using a  
294 hierarchical approach to STRUCTURE analysis. However, a deeper hierarchical level (e.g. the 4<sup>th</sup>  
295 iteration in the hierarchy) will define a weaker structure at the risk of detecting extremely fine population  
296 substructures.

297 By employing a genome scanning approach, we comparatively used neutral and non-neutral loci in  
298 examining genetic diversity and genetic distance. Importantly, we found greater genetic divergence at  
299 non-neutral loci than neutral loci. This pattern is consistent with the study of three caddisflies species and  
300 one mayfly species in the same catchment system (Watanabe et al. 2014). Other studies also found  
301 similar pattern of lower levels genetic divergence in neutral DNA markers compared with morphological  
302 traits (analogues to non-neutral markers) in macroinvertebrate species such as snails (Cook 1992),  
303 spiders (Gillespie and Oxford 1998) and damselflies (Wong et al. 2003). Based on the results of Dfdist,  
304 the 10 non-neutral loci were under divergent selection rather than stabilising selection, and hence  
305 presented greater genetic divergence compared with neutral loci (Table 2).

306 One of the main findings of this study is that the mountain burrowing mayfly *E. strigata* presents an  
307 adaptive divergence along an altitudinal gradient. Altitude is often reported to be closely related with a  
308 number of environmental factors that influence the life cycle and development of organisms (Múrria et al.  
309 2013, Halbritter et al. 2015). For example, altitude influences insect phenology, restricting the mating  
310 period to only a few days, thus leading to asynchronous emergence, which may act as a reproductive  
311 barrier between populations (Yaegashi et al. 2014, Watanabe et al. 2017) or as metabolism regulator  
312 (Gamboa et al. 2017). Altitude also influences air density which affects both respiration and the power  
313 required for flight. The haemoglobin gene and other genes with a potential role for adaptation to low O<sub>2</sub>  
314 may show divergence between populations along an altitude gradient (Keller et al. 2013).

315 As opposed to non-neutral makers, neutral markers are suitable for examining neutral process occurring  
316 under the drift-migration balance. Previous population genetic studies have inferred dispersal patterns of  
317 stream insects without differentiating neutral and non-neutral loci (Miller et al. 2002, Mila et al. 2010). This  
318 may cause an overestimation of genetic drift because non-neutral loci under divergent selection will

319 increase the estimates of genetic divergence (Kirk and Freeland 2011). Therefore, we used only neutral  
320 makers to infer dispersal patterns.

321 We did not find significant IBD for both geographic and riverine distances based on neutral loci,  
322 suggesting that populations are not in a genetic drift–migration equilibrium at the studied geographic  
323 scale (Supplementary Fig. S1). The results of the spatial autocorrelation analysis based on neutral loci  
324 showed significant positive autocorrelation coefficients at the shortest range (0–4 km; Fig. 5a), indicating  
325 low dispersal ability for *E. strigata*. Mayflies are generally considered to have a very low dispersal ability in  
326 mountain streams (Barber-James et al. 2007). Limited dispersal distances were also observed in  
327 stoneflies owing to their poor dispersal ability (Briers et al. 2003, 2004). In contrast, caddisflies were  
328 frequently reported to show strong dispersal ability. Yaegashi et al. (2014) reported that the caddisfly  
329 *Stenopsyche marmorata* showed pronounced dispersal ability along stream corridors up to 12 km.

330 In conclusion, the RF approach applied in this study performed better than the ordinal dbRDA in  
331 determining the influence of environmental factors on outlier loci under selection. Using neutral and non-  
332 neutral methods, we showed that the mountain burrowing mayfly *E. strigata* presents adaptive divergence  
333 along an altitudinal gradient. The hierarchical STRUCTURE analysis detected finer population structures  
334 and increased the power of outlier detection. A limitation of this study was that our study did not include  
335 many environmental factors, which may also be constrained factors and help to improve the model  
336 performance. In addition, sequencing the detected outlier loci would provide a deeper understanding of  
337 altitudinal adaptation in *E. strigata*.

## 338 **References**

- 339 Archer, K. J. and R. V. Kimes. 2008. Empirical characterization of random forest variable importance  
340 measures. *Computational statistics & data analysis* 52:2249–2260.
- 341 Baggiano, O., D. J., Schmidt, and J. M., Hughes. 2011. The role of altitude and associated habitat  
342 stability in determining patterns of population genetic structure in two species of *Atalophlebia*  
343 (Ephemeroptera: Leptophlebiidae). *Freshwater Biology* 56:230–249.

- 344 Baldwin, R. A. 2009. Use of Maximum Entropy Modeling in Wildlife Research. *Entropy* 11:854–866.
- 345 Ban, R., and T. Kawai. 1986. Comparison of the life cycles of two mayfly species between upper and  
346 lower parts of the same stream. *Aquatic Insects* 8:207–215.
- 347 Barber-James, H. M., J-L. Gattolliat, and M. D. Hubbard. 2007. Global diversity of mayflies  
348 (Ephemeroptera, Insecta) in freshwater. *Hydrobiologia* 595:339–350.
- 349 Beaumont, M. A. and D. J. Balding. 2004. Identifying adaptive genetic divergence among populations  
350 from genome scans. *Mol. Ecol* 13:969–980.
- 351 Beaumont, M. A. and R. A. Nichols. 1996. Evaluating loci for use in the genetic analysis of population  
352 structure. *Proc. R Soc. Lond B* 263:1619–1626.
- 353 Biau, G. and E. Scornet. 2016. A random forest guided tour. *TEST* 25:197–227.
- 354 Blagus, R. and L. Lusa. 2013. SMOTE for high–dimensional class–imbalanced Data. *BMC Bioinformatics*  
355 14: 106.
- 356 Bonin, A., P. Taberlet, and F. Pompanon. 2006. Explorative genome scan to detect candidate loci for  
357 adaptation along a gradient of altitude in the commonfrog (*Rana temporaria*). *Mol Biol Evol* 23:773–  
358 783.
- 359 Breiman, L. 2001. Random Forests. *Machine Learning* 45:5-32.
- 360 Briers, R. A., H. R. Gee, and R. Geoghegan. 2004. Inter–population dispersal by adult stoneflies detected  
361 by stable isotope enrichment. *Freshwater biology* 49:425–431.
- 362 Briers, R., H. Cariss, and J. H. R. Gee. 2003. Flight activity of adult stoneflies in relation to weather.  
363 *Ecological Entomology* 28:31–40.
- 364 Brouwer, J. H. F., A. Bessee-Lototskaya, and P. F. M. Verdonshot. 2017. Flow velocity tolerance of  
365 lowland stream caddisfly larvae (Trichoptera). *Aquat Sci* 79:419–425.

- 366 Chawla, N. V., K. W. Bowyer, and W. P. Kegelmeyer. 2002. SMOTE: Synthetic Minority Over-sampling  
367 Technique. *Journal of Artificial Intelligence Research* 16:321–357.
- 368 Cook, L. 1992. The neutral assumption and maintenance of color morph frequency in mangrove snails.  
369 *Heredity* 69:184–189.
- 370 Cutler, D. R. 2007. Random forests for classification in ecology. *Ecology* 88:2783–2792.
- 371 Egan, S. P., P. Nosil, and D. J. Funk. 2008. Selection and genomic differentiation during ecological  
372 speciation: isolating the contributions of host association via a comparative genome scan of  
373 *neoclamisus bebbianae* leaf beetles. *Evolution* 62:1162–1181.
- 374 Elbrecht, V., C. K. Feld, and F. Leese. 2014. Genetic diversity and dispersal potential of the stonefly  
375 *Dinocras cephalotes* in a central European low mountain range. *Freshwater Science* 33:181–192.
- 376 Evanno, G., S. Regnaut, and J. Goudet. 2005. Detecting the number of clusters of individuals using the  
377 software structure: a simulation study. *Molecular Ecology* 14:2611–2620.
- 378 Evans, J. S., M. A. Murphy, and S. A. Cushman. 2011. Modeling Species Distribution and Change Using  
379 Random Forest. Pages 139–159 in C. Drew, Y. Wiersma, F. Huettmann (eds). *Predictive Species and  
380 Habitat Modeling in Landscape Ecology*. Springer, New York, NY.
- 381 Excoffier, L., T. Hofer, and M. Foll. 2009. Detecting loci under selection in a hierarchically structured  
382 population. *Heredity* 103:285–298.
- 383 Falush, D., M. Stephens, and J. K. Pritchard. 2003. Inference of population structure using multilocus  
384 genotype data: linked loci and correlated allele frequencies. *Genetics* 164:1567–1587.
- 385 Falush, D., M. Stephens, and J. K. Pritchard. 2007. Inference of population structure using multilocus  
386 genotype data: dominant markers and null alleles. *Molecular Ecology Notes*. 7:574–578.

- 387 Fitzpatrick, M. C. and S. R. Keller. 2015. Ecological genomics meets community-level modelling of  
388 biodiversity: mapping the genomic landscape of current and future environmental adaptation. *Ecology*  
389 *Letters* 18:1–6.
- 390 Foll, M. and O. E. Gaggiotti. 2006. Identifying the environmental factors that determine the genetic  
391 structure of populations. *Genetics* 174:875–891.
- 392 Foll, M., and O. E. Gaggiotti. 2008. A genome-scan method to identify selected loci appropriate for both  
393 dominant and codominant markers: a Bayesian perspective. *Genetics* 180:977–993.
- 394 Gaggiotti, O. E., D. Bekkevold, and D. E. Ruzzante. 2009. Disentangling the effects of evolutionary,  
395 demographic, and environmental factors influencing genetic structure of natural populations: Atlantic  
396 herring as a case study. *Evolution* 63:2939–2951.
- 397 Galindo, J., and E. Rolán-Alvarez. 2009. Comparing geographical genetic differentiation between  
398 candidate and noncandidate loci for adaptation strengthens support for parallel ecological divergence  
399 in the marine snail *Littorina saxatilis*. *Molecular Ecology* 18:919–930.
- 400 Gamboa, M., M. C. Tsuchiya, and K. Watanabe. 2017. Differences in protein expression among five  
401 species of stream stonefly (Plecoptera) along a latitudinal gradient in Japan. *Insect biochemistry and*  
402 *physiology*. 96:e21422.
- 403 Genuer, R., J-M. Poggi, and C. Tuleau-Malot. 2010. Variable selection using random forests. *Pattern*  
404 *Recognition Letters* 31:2225–2236.
- 405 Gillespie, R. G. and G. S. Oxford. 1998. Selection on the color polymorphism in hawallan happy-face  
406 spiders: evidence from genetic structure and temporal fluctuations. *Evolution* 52:775–783.
- 407 Guillot, G. and F. Rousset. 2013. Dismantling the Mantel tests. *Methods in Ecology and Evolution* 4:336–  
408 344.



- 409 Halbritter, A. H., R. Billeter, and J. M. Alexander. 2015. Local adaptation at range edges: comparing  
410 elevation and latitudinal gradients. *Journal of Evolutionary Biology* 28:1849–1860.
- 411 Hauer, F. R., G. A. Lamberti. 2007. *Methods in stream ecology*. 3rd edition. Academic Press, London.
- 412 Hughes, J. M., D. J. Schmidt, and D. S. Finn. 2009. Genes in Streams: Using DNA to Understand the  
413 Movement of Freshwater Fauna and Their Riverine Habitat. *BioScience* 59:573–583.
- 414 Hwang, J. M. and Y. J. Bae. 2008. Review of the tropical Southeast Asian Ephemera (Ephemeroptera:  
415 Ephemeridae). *Aquatic Insects*. 30, 105–126.
- 416 Janitza, S., C. Strobl. And A. L. Boulesteix. 2013. An AUC–based permutation variable importance  
417 measure for random forests. *BMC Bioinformatics* 14:119.
- 418 Kawai T., and K. Tanida. 2005. *Aquatic insects of Japan: manuals with keys and illustration (in*  
419 *Japanese)*. Tokai University Press, Tokyo.
- 420 Keller, I., and O. Seehausen. 2012. Thermal adaptation and ecological speciation. *Molecular Ecology*  
421 21:782–799.
- 422 Keller, I., J. M., Alexander, and P. J., Edwards. 2013. Widespread phenotypic and genetic divergence  
423 along altitudinal gradients in animals. *Journal of Evolutionary Biology* 26:2527–2543.
- 424 Kirk, H., and J. R. Freeland. 2011. Applications and Implications of Neutral versus Non-neutral Markers in  
425 *Molecular Ecology*. *International Journal of Molecular Sciences* 12:3966–3988.
- 426 Lee, S. J., J. M. Hwang, and Y. J. Bae. 2008. Life history of a lowland burrowing mayfly, *Ephemera*  
427 *orientalis* (Ephemeroptera: Ephemeridae), in a Korean stream. *Hydrobiologia* 596:279–288.
- 428 Legendre, P., and M. J. Fortin. 2010. Comparison of the Mantel test and alternative approaches for  
429 detecting complex multivariate relationships in the spatial analysis of genetic data. *Molecular Ecology*  
430 *Resources* 10: 831–844.

- 431 Legendre, P., M-J. Fortin, and D. Borcard. 2015. Should the Mantel test be used in spatial analysis?  
432       Methods in Ecology and Evolution 6:1239–1247.
- 433 Li, B. K. Watanabe, and T-S. Chon. 2016. Identification of Outlier Loci Responding to Anthropogenic and  
434       Natural Selection Pressure in Stream Insects Based on a Self–Organizing Map. *Water* 8:188.
- 435 Li, F. Q., N. Chung, and Y-S. Park. 2013. Temperature change and macroinvertebrate biodiversity:  
436       assessments of organism vulnerability and potential distributions. *Climatic Change* 119:421–434.
- 437 Liaw A., and M. Wiener. 2002. Classification and regression by randomForest. *R News* 2:18–22.  
438       <http://CRAN.R-project.org/doc/Rnews/>.
- 439 Maciejewski, T. and J. Stefanowski. 2011. Local neighbourhood extension of SMOTE for mining  
440       imbalanced data. *Computational Intelligence and Data Mining*. 104-111.
- 441 Marmion, M., M. Parviainen, and W. Thuiller. 2009. Evaluation of consensus methods in predictive  
442       species distribution modelling. *Diversity and Distributions* 15:59–69.
- 443 Mccairns, R. J. S. and L. Bernatchez. 2008. Landscape genetic analyses reveal cryptic population  
444       structure and putative selection gradients in a large–scale estuarine environment. *Molecular Ecology*  
445       17:3901–3916.
- 446 Medugorac, I., A. Medugorac, and M. Förster. 2009. Genetic diversity of European cattle breeds  
447       highlights the conservation value of traditional unselected breeds with high effective population size.  
448       *Molecular Ecology* 18:3394–3410.
- 449 Mila, B., S. Carranza, O. Guillaume, and J. Clobert. 2010. Marked genetic structuring and extreme  
450       dispersal limitation in the Pyrenean brook newt *Calotriton asper* (Amphibia: Salamandridae) revealed  
451       by genome–wide AFLP but not mtDNA. *Molecular Ecology* 19:108–120.

- 452 Miller, M. P., D. W. Blinn, & P. Keim. 2002. Correlations between observed dispersal capabilities and  
453 patterns of genetic differentiation in populations of four aquatic insect species from the Arizona White  
454 Mountains, U.S.A. *Freshwater Biology* 47:1660–1673.
- 455 Múrria, C., N. Bonada, A. P. Vogler. 2013. Higher  $\beta$ - and  $\gamma$ -diversity at species and genetic levels in  
456 headwaters than in mid-order streams in Hydropsyche (Trichoptera). *Freshwater Biology* 58:2226–  
457 2236.
- 458 Nosil, P., D. J. Funk, and D. Ortiz-Barrientos. 2009. Divergent selection and heterogeneous genomic  
459 divergence. *Molecular Ecology* 18:375–402.
- 460 Nosil, P., S. P. Egan, and D. J. Funk. 2008. Heterogeneous genomic differentiation between walking–  
461 stick ecotypes: “Isolation by adaptation” and multiple roles for divergent selection. *Evolution* 62:316–  
462 336.
- 463 Oksanen, J. et al. 2018. Vegan: community ecology package. R package vegan, vers. 2.4–6.  
464 <https://CRAN.R-project.org/package=vegan>.
- 465 Oleksa, A., I. J. Chybicki, and J. Burczyk. 2013. Isolation by distance in saproxylic beetles may increase  
466 with niche specialization. *J Insect Conserv* 17:219–233.
- 467 Peakall, R. and P. E. Smouse. 2012. GenAlEx 6.5: genetic analysis in Excel. Population genetic software  
468 for teaching and research—an update. *Bioinformatics* 28:2537–2539.
- 469 Polato, N. R. M. M., Gray, and K. R. Zamudio. 2017. Genetic diversity and gene flow decline with  
470 elevation in montane mayflies. *Heredity* 119:107–116.
- 471 Prasad, A. M., L. R. Iverson, and A. Liaw. 2006. Newer classification and regression tree techniques:  
472 bagging and random forests for ecological prediction. *Ecosystems* 9:181–199.
- 473 Pritchard, J. K., M. Stephens, P. Donnelly. 2000. Inference of population structure using multilocus  
474 genotype data. *Genetics* 155:945–959.

- 475 R Development Core Team. 2015. R: A Language and Environment for Statistical Computing. (R  
476 Foundation for Statistical Computing).
- 477 Reisch, C. 2007. Genetic structure of *Saxifraga tridactylites* (Saxifragaceae) from natural and man-made  
478 habitats. *Conserv Genet* 8:893-902.
- 479 Renaut, S., A. W. Nolte, and L. Bernatchez. 2011. SNP signatures of selection on standing genetic  
480 variation and their association with adaptive phenotypes along gradients of ecological speciation in  
481 lake white fish species pairs (*Coregonus spp.*). *Molecular Ecology* 20:545–559.
- 482 Rosenberg, N. A. T. Burke, and S. Weigend. 2001. Empirical evaluation of genetic clustering methods  
483 using multilocus genotypes from 20 chicken breeds. *Genetics* 159:699–713.
- 484 Rostgaard, S., and D. Jacobsen. 2005. Respiration rate of stream insects measured in situ along a large  
485 altitude range. *Hydrobiologia* 549:79–98.
- 486 Torgo, L. 2013. Package ‘DMwR’. Comprehensive R Archive Network. [http://cran.r-](http://cran.r-project.org/web/packages/DMwR/DMwR.pdf)  
487 [project.org/web/packages/DMwR/DMwR.pdf](http://cran.r-project.org/web/packages/DMwR/DMwR.pdf).
- 488 Vähä, J., J. Erkinaro, and C. R. Primmer. 2007. Life–history and habitat features influence the within–river  
489 genetic structure of Atlantic salmon. *Molecular Ecology* 16:2683–2654.
- 490 Vekemans X., T. Beauwens, and I. Roldan-Ruiz. 2002. Data from amplified fragment length  
491 polymorphism (AFLP) markers show indication of size homoplasy and of a relationship between  
492 degree of homoplasy and fragment size. *Molecular Ecology* 11:139-151.
- 493 Vittinghoff, E., D. V. Glidden, and C. E. McCulloch. 2012. Regression Methods in Biostatistics: Linear,  
494 Logistic, Survival, and Repeated Measures Models. *In* Vittinghoff, E, D. V. Glidden, and C. E.  
495 McCulloch (eds). Springer Science & Business Media. Springer, New York.
- 496 Vos, P., R. Hogers, and M. Zabeau. 1995. AFLP: a new technique for DNA fingerprinting. *Nucleic Acids*  
497 *Research* 23:4407–4414.

- 498 Watanabe, K. and M. T. Monaghan. 2017. Comparative tests of the species-genetic diversity correlation  
499 at neutral and non-neutral loci in four species of stream insect. *Evolution* 71:1755–1764.
- 500 Watanabe, K., M. T. Monaghan, and T. Omura. 2008. Longitudinal patterns of genetic diversity and larval  
501 density of the riverine caddisfly *Hydropsyche orientalis* (Trichoptera). *Aquatic insects*. 70:377–387.
- 502 Watanabe, K., S. Kazama, and M. T. Monaghan. 2014. Adaptive Genetic Divergence along Narrow  
503 Environmental Gradients in Four Stream Insects. *PLoS ONE* 9:e93055.
- 504 Whiteley, A. R. A. Bhat, and L. Bernatchez. 2011. Population genomics of wild and laboratory zebrafish  
505 (*Danio rerio*). *Molecular Ecology* 20:4259–4276.
- 506 Wilcock, H. R., M. W., Bruford, and A. G., Hildrew. 2007. Landscape, habitat characteristics and the  
507 genetic population structure of two caddisflies. *Freshwater Biology* 52:1907–1929.
- 508 Wong, A., M. L. Smith, and M. R. Forbes. 2003. Differentiation between subpopulations of a  
509 polychromatic damselfly with respect to morph frequencies, but not neutral genetic markers. *Molecular*  
510 *Ecology* 12:3505–3513.
- 511 Yaegashi, S., K. Watanabe, and T. Omura. 2014. Fine-scale dispersal in a stream caddisfly inferred from  
512 spatial autocorrelation of microsatellite markers. *Molecular approaches in freshwater ecology* 33:172–  
513 180.
- 514 Zhivotovsky, L. A. 1999. Estimating population structure in diploids with multilocus dominant DNA  
515 markers. *Molecular Ecology* 8:907–913.

516

## 517 **Acknowledgements**

518 This research was financially supported by the Japan Society for the Promotion of Science (JSPS) (grant  
519 numbers: 16H04437, 17H01666, 16K18174). We thank K. Nagamine, S. Takahashi and Y. Kumagai for

520 assistance with field sampling and laboratory works and T. Omura for useful suggestions. H. Harada,  
521 Tohoku University, allowed us to use their DNA sequencer and analyzing system.

## 522 **Author Contributions**

523 B.L. analysed the data and wrote the manuscript; S.Y. conducted fieldwork, DNA extraction and AFLP  
524 experiments; T.M.C. contributed to developing the analytical methods; G.M. and K.W. edited and revised  
525 the manuscript. All authors contributed to writing the manuscript.

526 **Additional Information**

527

528 **Figures**

529

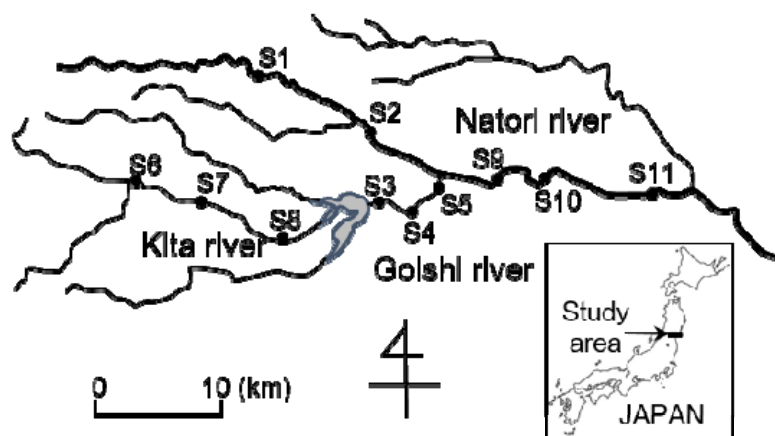

530

531

532 **Figure 1.** Map of 11 sampling sites for *Ephemera strigata* in the Natori River Basin in northeastern Japan.

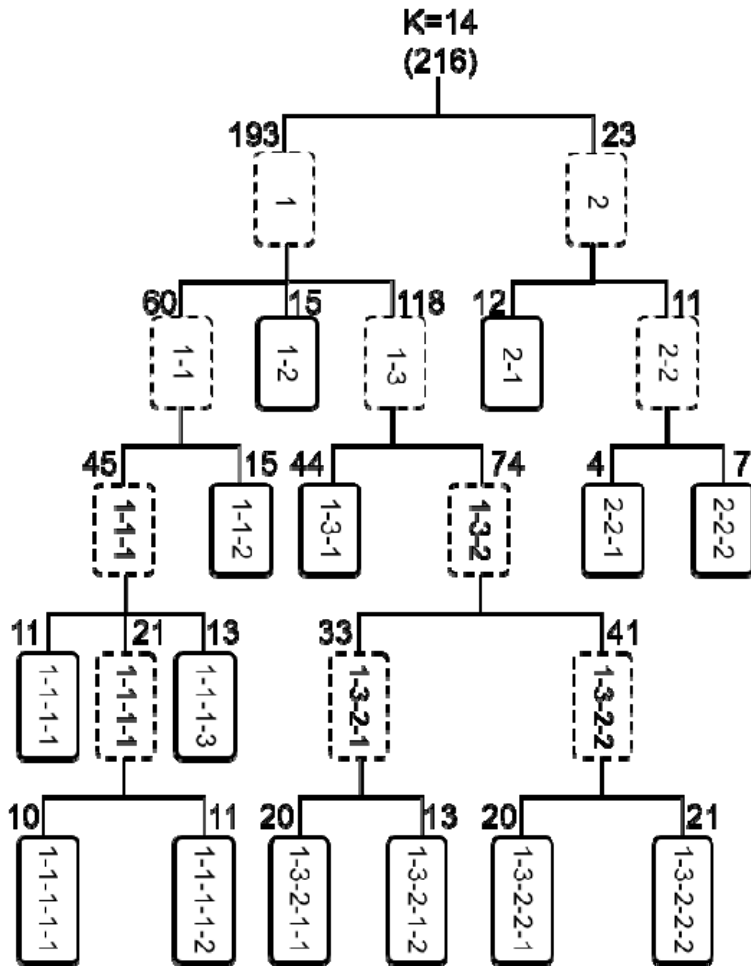

533

534 **Figure 2.** Subpopulation structure of *Ephemera strigata* as determined using STRUCTURE with  
535 hierarchical iterations. Dashed boxes indicate subpopulations and solid boxes indicate final populations.  
536 Numbers at the top of boxes indicate the number of individuals assigned to the populations. A total of 14  
537 groups (K) were defined from 216 individuals.



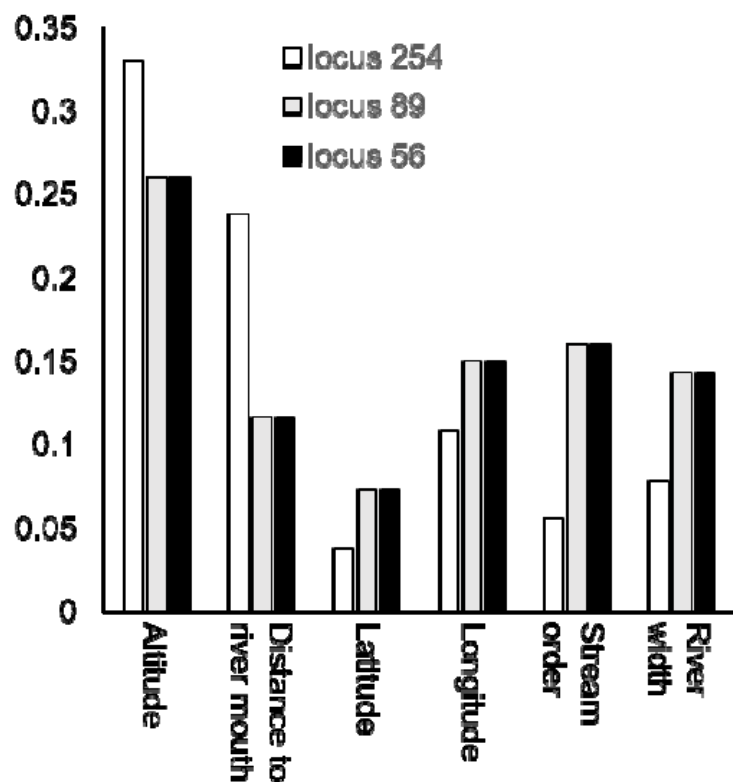

538

539 **Figure 3.** Relative importance of environmental variables based on the random forest model for three  
540 non-neutral loci (56, 89 and 254).

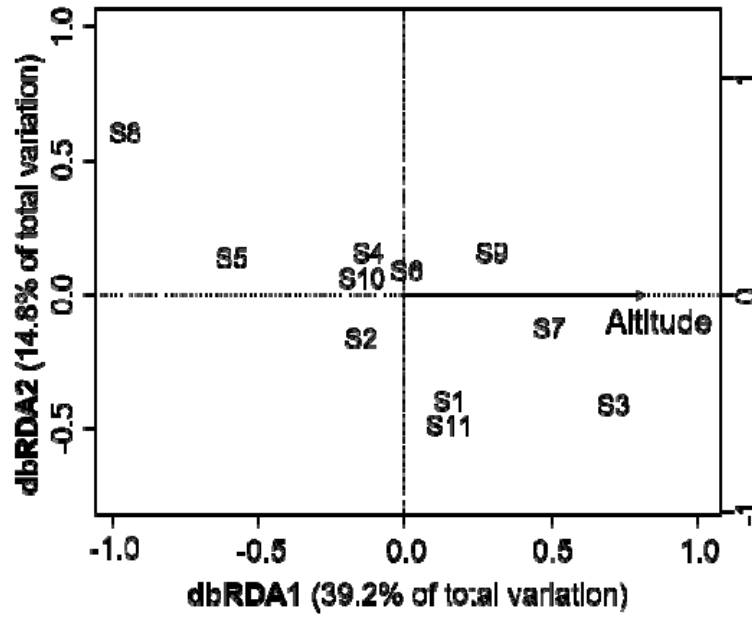

541

542 **Figure 4.** Distance-based redundancy analysis (dbRDA) describing the influence of environmental

543 heterogeneity on genetic variation at a non-neutral locus (254).

544

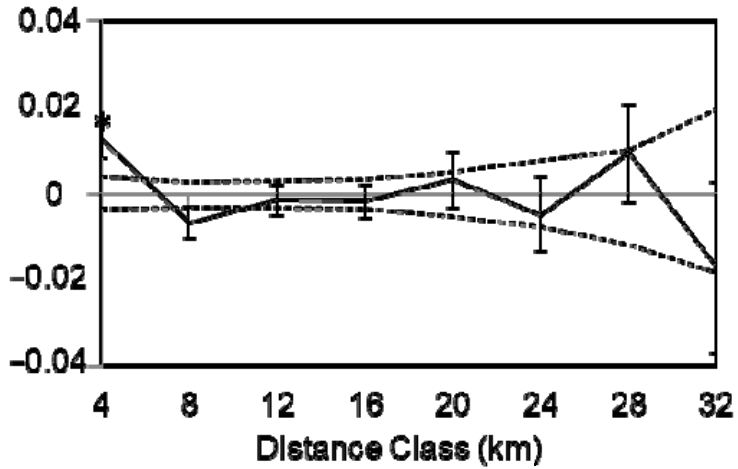

545

546 **Figure 5.** Spatial autocorrelation at 4-km distance classes based on geographic distance for neutral loci.

547 Dashed lines indicate permutated 95% confidence intervals and error bars indicate jackknifed 95%

548 confidence intervals. \* indicates significant spatial autocorrelation ( $p < 0.05$ ).

549 **Tables**

550 **Table 1.** Results of outlier loci detection and model construction based on three population definitions and  
 551 two adaptive divergence models. Out of the 10 non-neutral loci identified from the 14 populations  
 552 delineated by the hierarchical STRUCTURE analysis, three loci (56, 89 and 254) were modelled by  
 553 random forest (AUC > 0.7) and one locus (254) was modelled by dbRDA ( $p < 0.05$ ).

| Population definition  | Number of populations | Non-neutral loci |          |      | Neutral loci |               | Adaptive divergence model |  |
|------------------------|-----------------------|------------------|----------|------|--------------|---------------|---------------------------|--|
|                        |                       | Dfdist           | BayeScan | Both |              | Random forest | dbRDA                     |  |
|                        |                       |                  |          |      |              |               |                           |  |
| Sites                  | 11                    | 0                | 0        | 0    | 0            | -             | -                         |  |
| STRUCTURE              | 2                     | 0                | 0        | 0    | 0            | -             | -                         |  |
| Hierarchical STRUCTURE | 14                    | 21               | 26       | 10   | 346          | 3             | 1                         |  |

554

555 **Table 2.** Genetic diversity and divergence measured using the following: 1) all loci, 2) only neutral loci  
556 and 3) only non-neutral loci.  $H_t$  = total expected heterozygosity;  $H_w$  = mean expected heterozygosity  
557 within sites;  $F_{ST}$  = Wright's fixation index among sites.

|                  | $H_t$  | $H_w$  | $F_{ST}$ |
|------------------|--------|--------|----------|
| All loci         | 0.1358 | 0.1357 | 0.029    |
| Neutral loci     | 0.1173 | 0.1155 | 0.021    |
| Non-neutral loci | 0.4379 | 0.3523 | 0.039    |

558

559 **Supplementary Information**

560

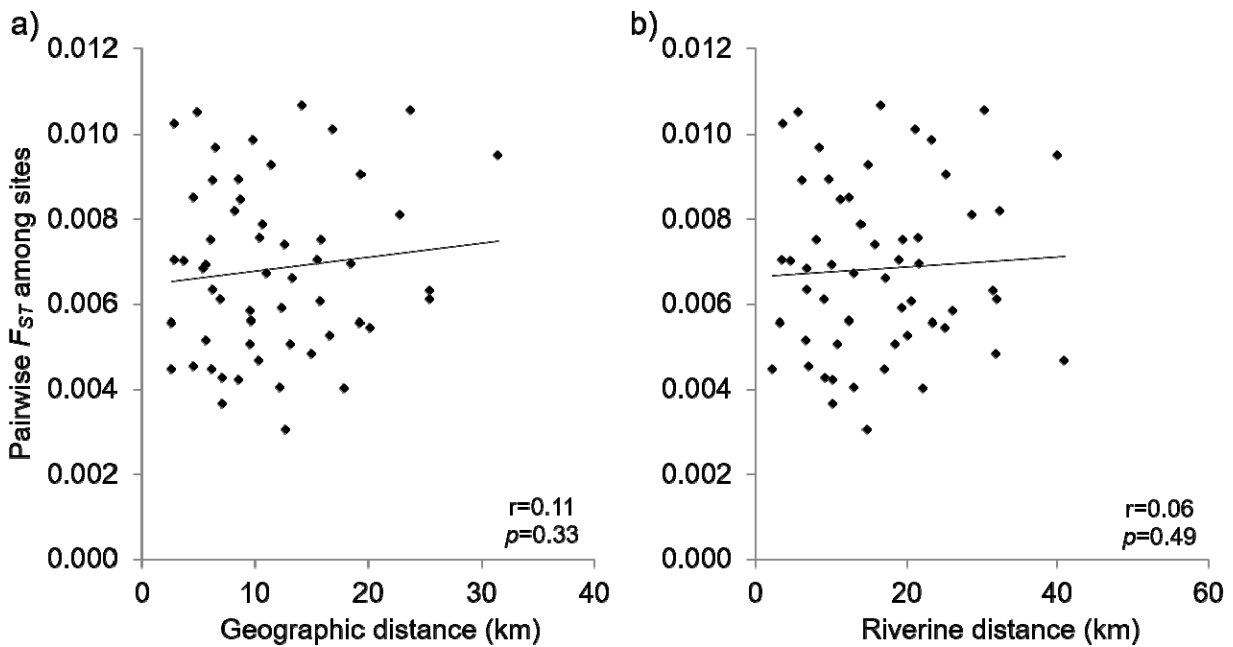

561

562 **Figure S1.** Isolation by distance calculated using geographic (a) and riverine (b) distance. Solid lines  
563 indicate correlations between Wright's fixation index ( $F_{ST}$ ) and geographic ( $r = 0.11$ ,  $p = 0.33$ ) or riverine  
564 distance ( $r = 0.06$ ,  $p = 0.49$ ) calculated with Mantel tests.
